# Supplementary material for: The osteometric identification of castrated reindeer (Rangifer tarandus) and the significance of castration in tracing human-animal relationships in the North
Source: PubMed Central journal article supplement (PMC9734228; doi:10.1007/s12520-022-01696-y), 2022-12-09

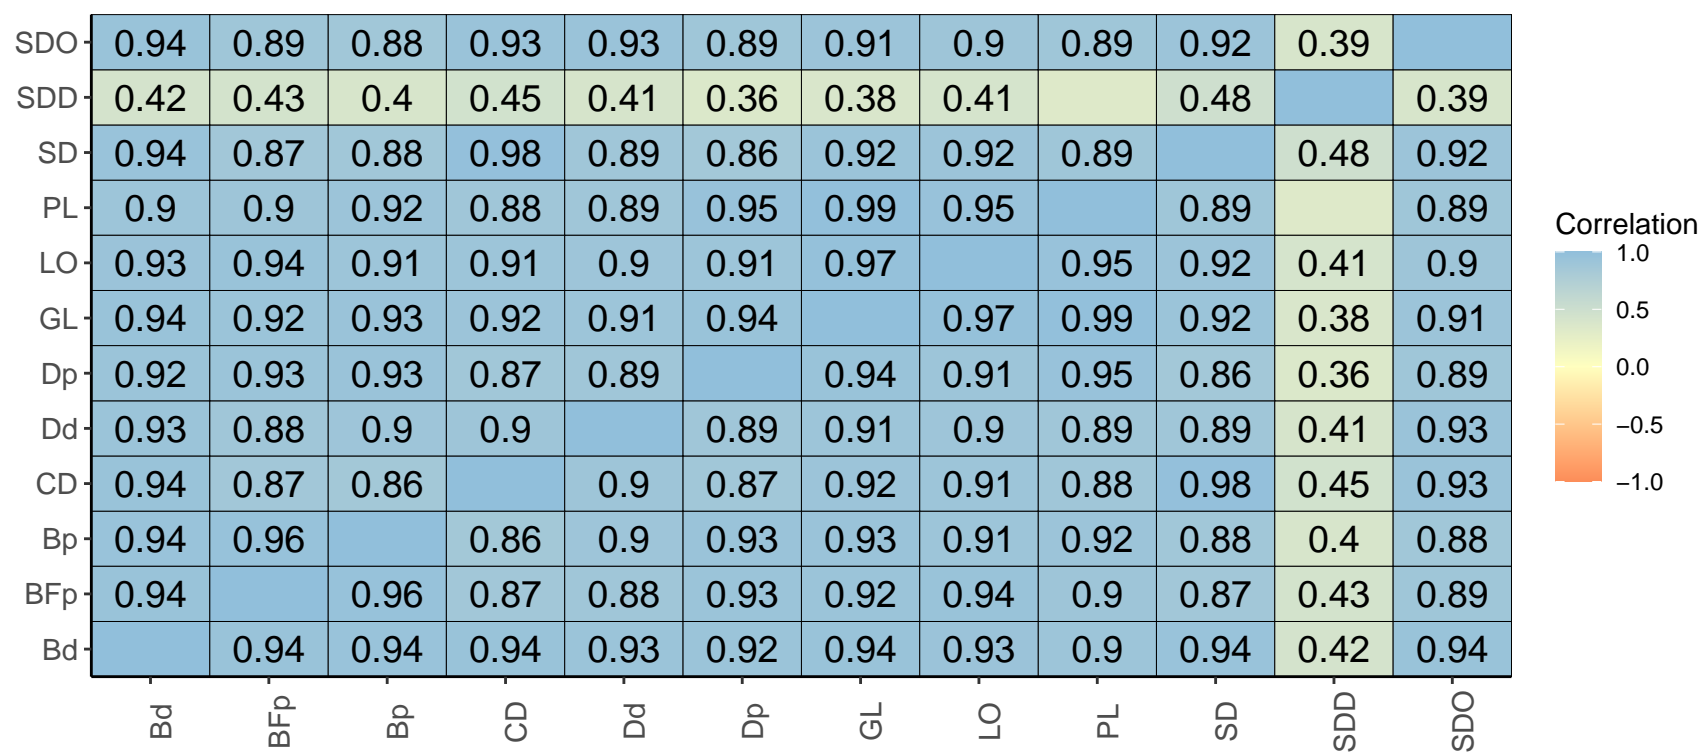

Supplement: 12520_2022_1696_MOESM3_ESM.pdf [file 12520_2022_1696_MOESM3_ESM.pdf]
